# Supplementary material for: The relationship between steroid treatment and mortality in patients with COVID-19 followed up in an intensive care unit
Source: PeerJ. 2025 Jan 17;13:e18606. doi: 10.7717/peerj.18606 (PMC11745129; doi:10.7717/peerj.18606)
Supplement: Supplemental Information 1 [file peerj-13-18606-s001.xlsx]

## Sheet: alicovid
Age	gender	COPD	CKD	Diabetes mellitus	Hypertension	Heart failure	Pulse	Systolic blood pressure	Diastolic blood pressure	Fever	BMI	Troponin	Glucose	Urea	Creatinine	Sodium	Potassium	AST	ALT	LDH	Calcium	Ferritin	CRP	WBC	RBC	Hemoglobin	Neutrophil	Lymphocyte	INR	D-dimer	Fibrinogen	PRO- BNP	Triglyceride	LDL	Steroid period	Hospital stay	Intensive care stay	Complaint period	Peep/Fio2 rate	APACHE-2	Mechanical ventilator days	Steroid dose	Mortality
49	male						105	152	82	36.5	29.3	16	108	58	0.9	136	4.4	20	40	383	9.5	23	103	12.4	4.5	10.6	11.1	0.6	1	510	573	2520			58	59	56	8	166	28		high dose	no
61	male	no	no	no	yes	no	99	122	70	36.6	29	44	206	58	1	138	3.5	59	57	724	8	240	131	9.4	5.3	14.6	8.2	0.8	1	1620	379	1160			55	56	51	1	205	12		high dose	no
66	female	no	yes	yes	yes	no	75	109	47	36.5	38	23	137	206	4	140	4.8	5	6	203	7.7	206	7.01	9.1	2.6	7.6	8.7	0.2	0.9	4490	255				45	46	41	6	209	43	38	high dose	no
61	male	no	no	yes	yes	no	78	154	86	36.6	32.5	11	115	36	0.9	138	4.5	54	84	592	7.7	506	85	12.4	4.7	13.5	9.8	0.2	0.9	10600	605	1220			35	36	31	4	216	11	21	high dose	no
42	male	no	no	no	no	no	77	110	64	36.4	24	5	141	64	0.77	138	3.9	34	39	992	7.5	1954	228	2.1	2.1	6.7	1.9	0.2	1.2	2380	861	1290	110		33	34	29	4	233	13	14	high dose	no
69	female	no	no	yes	yes	no	88	151	88	36	29	43	126	36	0.8	140	3.5	42	9	507	6.8	1500	58	6.3	2.8	8.6	4.3	1.5	1.5	960	409	868			31	33	28	4	200	18	1	high dose	yes
50	female	no	yes	no	yes	no	80	96	52	36.4	32	27	132	25	0.6	135	3.4	33	68	797	7.4	465	165	4.5	4.1	11.5	3.4	0.9	1	970	778	380			31	33	28	2	240	11	9	high dose	yes
29	female	no	no	no	no	no	96	112	71	36	24	6	125	13	0.48	138	4.1	230	211	467	8.5	139	57	8.8	4.1	13	7.1	1.1	0.8	4360	362	70			32	33	28	3	218	16		high dose	no
71	female	no	no	yes	yes	no	85	152	76	36.4	31	6	341	23	0.46	132	4.6	15	24	433	7.8	1.6	153	7.1	4.1	9.8	5.5	1.1	0.9	1470	885	723	69		28	31	24	4	212	21	18	high dose	yes
82	male	no	yes	yes	no	no	96	128	80	36.5	21	33	393	141	1.78	134	4.7	25	34	350	8.2	554	17	5.2	4.7	12.9	4.8	0.2	1.1	273	362	449			24	31	23	8		21		high dose	yes
65	male	no	no	no	no	no	88	121	63	36	22	13	97	37	1.1	131	5.2	31	27	245	9.7	415	170	10.3	3	8.6	8.3	1.5	1	3930	640	1410			23	31	22	4	170	18	2	high dose	yes
69	male	no	no	no	no	yes	76	112	69	36.5	27	18	132	38	0.9	137	3.6	64	29	632	9	529	153	6.2	4.5	15	5.5	0.4	1	730	678	125			25	31	21	3	169	24	18	high dose	yes
41	male						78	119	66	36.5	28	10	130	35	0.8	142	4.3	72	82	1025	7.9	986	104	16.9	4.1	13.4	16.1	0.2	0.9	530	605	549			29	30	28	4	218	20	6	high dose	no
51	male	no	no	no	no	no	145		113	36.7	40	285	221	38	0.7	133	3.7	51	34	611	8.2	247	213	16.5	6.1	13.6	12.4	0.3	1.1	1880	724	402	241		27	28	23	1	211	6	18	high dose	no
52	male	no	no	no	no	no	86	140	79	36.5	24	26	165	31	0.8	134	4	38	27	490	8.1	77	258	8.4	4.8	11.1	7.6	0.5	1	520	573	301	171	93	23	24	23	3	201	14	9	high dose	no
44	female	no	no	no	yes	no	77	111	66	37.2	29	68	226	43	0.6	141	3.3	44	39	903	8	189	127	7.5	4.7	13.1	6.9	0.1	0.9	1130	432				22	24	21	4	222	15	2	high dose	no
61	female	yes	no	no	no	no	92	120	80	36	33	20	145	26	0.2	138	4.9	53	10	453	7.9	946	132	7.9	3.5	10.8	6.5	1.1	3.5	19790	409	1120	195	153	21	23	20	8	199	17	1	high dose	no
65	female	no	no	yes	yes	yes	88	140	65	36	21.2	31	116	22	0.48	135	4.9	22	28	285	8.6	137	147	1.9	3.9	11.2	1	0.7	0.9	1440	741	399	167		21	23	20	6	199	40	6	high dose	no
52	female	no	no	no	no	no	102	104	74	36	24	8	126	35	0.8	140	3.2	59	26	614	8.2	453	145	4.6	4	11.7	3	1.2	1	640	605	409			22	23	18	4	190	21	11	high dose	no
46	female	no	no	no	no	no	89	130	80	36.2		2	122	47	0.2	143	3.9	9	22	157	8	42	222	9.3	3.3	7.7	8.1	0.7	1.2	1030	510	162			22	23	18	3	216	15		high dose	no
55	male	no	no	no	yes	no	81	178	83	36.6	32	9	238	40	0.8	137	5.1	42	66	615	8.5	404	18.5	7.8	5.8	16.8	6.9	0.4	0.8	420	442	412			22	23	18	8	123	9		high dose	no
61	male			yes			96	112	75	36.4	27	3	255	75	0.8	135	4.2	41	57	391	9.1	417	72	13.8	4.9	13.6	12.8	0.5	0.9	500	724	182			21	22	17	8	216	4		high dose	no
68	male	yes	no	no	no	no	93	144	58	36.5	29	10	103	38	0.91	139	4.6	30	30	286	8.5	198	218	8.1	4.8	13.8	6.2	1.1	0.99	480	573				20	21	20	7	192	16	14	high dose	no
78	female						70	112	66	36.6	44	25	180	48	1.5	133	4.6	51	20	468	7.7	81	90	5.2	4.1	10.6	4.2	0.7	1	880	527	1990			19	21	18	5	168	30	2	high dose	yes
78	female	no	no	no	no	no	140	108	72	36	29	24	177	98	1.9	140	5	72	35	413	9.2	127	417	17.4	5	15.4	14.5	2	0.9	4310	510	1020	83		20	21	16	6	205	28	89	high dose	no
52	male	no	no	yes	no	no	84	125	79	36	30	8	147	55	0.8	132	4.2	43	35	501	9.1	100	109	8.3	4.6	12.3	7.3	0.6	0.9	290	510	85			18	19	16	5	218	12		high dose	no
67	male	no	no	no	no	no	92	117	54	36	28	13	154	57	1	141	3.7	47	46	332	7.8	1159	202	17.8	4.7	13.8	16.4	0.1	1.2	180	885	2510			16	18	15	4	221	10	3	high dose	yes
39	male						101	137	90	36.5	28	3	184	34	0.7	136	4.2	44	18	528	7.7	1179	101	3.2	4.5	14.3	2.6	0.4	0.8	650	544	82	126	106	16	18	15	6	216			high dose	no
55	female	no	no	yes	yes	no	85	132	69	36.7	44	4	99	40	1.13	132	3.8	53	62	222	8.5	137	26	5.5	4.5	12.3	3.7	1.2	0.9	1220	470				16	17	12	4	216	40		high dose	no
60	female	no	no	yes	yes	yes	82	139	71	36.7	28	8	224	59	1.08	121	3.1	25	37	513	7.9	826	108	12.5	4.7	12.7	11.4	0.3	0.9	1220	640		137		14	16	13	7	178	16	3	high dose	yes
56	male						65	136	71	36.6	31	6	358	45	0.6	144	4.9	38	90	730	8.3	469	25	8.2	4.6	13	7.6	0.2	0.9	1120	573	1070			14	16	13	2	218	12		high dose	no
29	female	no	no	no	no	no	78	72	52	36.2	27	4	174	11	0.3	137	3.7	26	15	289	7.9	99	111	5.8	3.4	10.6	5.1	0.6	0.9	1940	409	117	240		14	16	13	6	212	10	7	high dose	no
78	male						82	144	86	36.5	26.3	24	459	71	1.1	125	3.5	55	28	801	7.4	993	116	13.1	3.9	12.5	11.6	0.4	1.1	2010	398	870			15	16	11	6	134			high dose	no
52	male						100	139	63	36.3	29	4	114	29	0.8	140	4	29	41	406	8	446	67	5.9	5.4	15.9	4.1	1	1	510	678	70			13	15	12	6	178	15	6	high dose	yes
58	male	no	no	no	no	no	98	125	95	36.2	25	4	85	38	0.8	140	4.4	14	13	163	9.1	30	9.2	9.5	5.1	16.5	6.5	2	0.9	510	305	82			14	15	10	4	140			high dose	no
67	female	no	no	no	yes	no	85	142	75	36.6	29	12	252	32	0.59	143	3.3	113	84	583	8.4	1818	198	17.9	4.4	13.1	16.8	0.3	0.8	500	818				13	14	14	4	188	38	9	high dose	yes
44	female	no	no	no	no	no	125	124	78	36.5	21	6	102	27	0.56	137	5.4	51	66	820	8.9	425	17.6	8.3	5.5	15	7.2	0.2	0.9	2670	398	82	264	195	13	14	14	8	200	7	9	high dose	yes
85	male	no	no	no	yes	no	103	100	74	36	40	442	163	81	1.2	143	4.2	23	17	382	8.8	111	31	22.1	4.2	13.1	19.9	1.3	1	3050	605	9600			12	14	11	6	154	18	3	high dose	yes
51	female	no	no	no	no	no	88	136	70	36.5	35	5	162	29	0.9	137	3.9	49	29	718	8.6	103	298	7.8	4.2	11.3	6.7	0.6	1	990	692	344			13	14	11	4	222	12		high dose	no
77	male	yes					86	152	80	36.5	20	12	104	46	0.8	145	4.2	11	13	199	7.9	105	24	5.4	3.3	10.3	5	0.1	0.9	3860	346	7140			13	14	9	4	122			high dose	no
57	female	no	no	yes	yes	no	52	138	50	36.5	29.3	4	85	30	0.6	132	3.5		21	315	8.2	141	23	4.2	4.6	13.1	3.2	0.8	0.9	400		275			13	14	9	7	199	11		high dose	no
85	male	no	no	no	no	no	88	104	69	36.4	25	13	180	128	2.14	145	3.3	28	26	316	8.1	318	273	13.4	4.7	15	13.6	0.1	1.1	1200	678	3730			11	13	12	2	222		1	high dose	yes
89	female	no	no	no	yes	no	60	187	86	36	23	281	130	63	0.9	145	3.4	22	8	368	7.6	358	168	11.1	3.8	12	10.7	0.1	1.1	1880	408	15400			11	13	10	5	140	23	2	high dose	yes
68	male	yes	no	yes	yes	no	101	179	86	37.5	24	36	342	65	1.37	129	4.2	26	22	318	8.8	242	347	12.9	3.8	10.4	11.3	1.2	1.1	1530	692	2830			11	13	10	9	70	27	8	high dose	yes
55	male	no	no	no	yes	no	109	157	76	36.6	31.2	7	242	25	0.65	138	4	31	20	555	8.9	243	249	12	4.2	12.6	11.2	0.3	1.02	860	900		138		11	13	10	4	145	15		high dose	no
58	male	no	no	no	no	no	96	115	63	36.4	27	7	192	51	1	140	4.6	36	40	545	7.8	640	434	7	4	12.5	6.5	0.3	1.1	660	900	387	422	146	11	13	10	4	222	9		high dose	no
78	male	no	yes	yes	yes	no	102	195	85	36.2	28	51	340	218	4.5	137	4.9	11	7	209	7.7	321	127	4.2	3.5	10	3.7	0.3	1	490	544	13700	141	103	10	12	9	3	22	22	1	high dose	yes
89	female	no	no	no	yes	yes	100	127	77	36.4	35	15	122	66	1.8	141	4.5	19	34	490	9.2	395	257	8.7	4.01	11.6	8.1	0.4	0.8	410	825	2250	167		10	12	9	1	199	26	4	high dose	yes
82	female	no	no	yes	yes	no	60	102	55	36	22	225	260	127	3.8	135	5.1	16	41	302	8.2	275	318	15.1	3.8	11	14.1	0.7	1.1	1930	512	16100	77	58	10	12	9	8	197	40	6	high dose	yes
56	male	no	no	no	no	no	76	120	80	36	26	8	93	31	0.9	137	4	67	48	631	7.7	310	185	8.3	4.2	12.3	6.9	0.9	1	1180	678	70			11	12	9	3	111	11		high dose	no
51	male	no	no	yes	no	no	90	145	75	36.3	24	5	202	41	0.7	136	3.9	37	26	412	8.4	398	185.6	4.4	5.8	15	3.8	0.3	0.9	600	778	221			11	12	9	4	205			high dose	no
46	female						90	150	90	36.4	25	9	261	28	0.6	137	4.4	58	58	617	9.1	147	36	7.8	4.8	14	6.9	0.3	0.9	1060	544	140			11	12	9	4	216			high dose	no
45	male	no	no	yes	no	no	88	121	76	36.6	29	3	326	47	0.8	134	4.2	35	67	302	8.5	379	75	9.1	4.4	12.9	8.2	0.5	0.9	470	839	191			11	12	7	6	178			high dose	no
71	male	no	no	no	yes	no	122	109	69	36.5	27	225	118	42	0.8	142	2.5	39	47	423	8.7	254	149	10.4	4.5	12.2	9.2	0.8	0.9	470	640	7990			11	12	7	8	131			high dose	no
71	male						98	110	52	36	26.5	3	175	41	0.4	138	4.8	56	40	750	8.1	922	48.8	6.6	4.2	13.9	6.2	0.1	0.9	1180	580	432			9	11	11	9	150	6	1	high dose	yes
77	female	no	no	yes	yes	no	120	140	72	36.4	28	65	360	88	2	143	4.3	127	54	645	8.7	919	273	14.7	3.9	10.2	13.4	0.7	1	2530	900	4660			9	11	8	8	167	21	7	high dose	yes
58	female	no	no	no	no	no	100	110	70	36	31	5	90	23	0.83	137	3.7	42	44	366	8.5	140	66	4.4	4.8	12	3.2	1	0.9	510	481	290			10	11	6	1	159			high dose	no
60	male	no	yes	no	no	no	103	138	78	36.5	24	7	472	60	0.9	136	4.8	25	21	251	7.6	914	28	10.3	3.6	11.2	9.5	0.3	0.9	450	640	906			10	11	6	6	218	12		high dose	no
51	male	no	no	no	no	no	104		103	36.4	28	3	131	45	0.8	136	4.7	29	56	373	8.7	75	141	16	5.8	14.3	14.8	0.4	1	500	900	79	144	135	10	11	6	3	145	11		high dose	no
63	male	no	no	no	no	no	86	105	62	36	24	19	141	39	0.7	140	3.9	130	190	589	7.9	529	27	12.7	4.3	12.7	12	0.4	0.9	510	510	4610	150	104	10	11	6	4	122	13		high dose	no
71	male	no	no	no	no	no	108	126	78	36	22	31	108	50	0.7	133	3.8	53	85	912	7	4928	177	40	3	8.8	36	3	1.9	10930	510	5290			8	10	7	6	100	38		high dose	yes
60	male						84	102	58	36	31	10	319	42	1	134	4.9	46	45	905	8	620	226	6.4	2.7	10.1	5.6	0.4	1.2	8010	408	1540			9	10	7	7	205	18		high dose	no
48	male						84	110	74	36.5	27	1	272	34	0.53	134	3.7	31	67	211	7.9	237	46	7.6	4.9	13.1	6.4	0.5	0.9	620	605	75			9	10	5	4	205	26		high dose	no
57	male	no	no	no	no	no	75	132	85	36.5	29.6	10	121	58	0.7	145	3.9	62	46	770	8.9	572	71	11.2	4.2	12.7	9.7	0.6	1	2600	678	836			7	9	6	4	90		1	high dose	yes
54	male	no	no	yes	no	no	69	126	76	36.4	28	6	447	49	0.9	134	4.4	33	50	516	8.8	2870	64	21	3.4	13	18.7	0.5	1	560	605		187	92	7	9	6	6	199	9		high dose	no
51	male	no	no	no	no	no	68	122	78	36.5	27	4	154	47	0.6	140	5.6	87	90	429	8.4	811	49	4	4.8	9.7	3.3	0.5	1	640	649	70			8	9	4	9	216	3		high dose	no
56	female						78	156	75	36.5	27	4	209	41	0.5	137	3.8	24	57	283	8.4	292	97	12.3	5.4	10.6	11	0.6	1	330	778	194			8	9	4	2	222	11		high dose	no
39	male	no	no	no	no	no	101		101	36.8	27		235	41	0.5	140	4.9	70	70	770	8.5	467	21	7.2	5	15.1	6.8	0.2	0.8	330	679	384	164	115	8	9	4	4	167	7		high dose	no
61	male	no	no	yes	yes	yes	76	106	72	36.3	25	21	226	58	1.01	131	4.22	15	30	329	8.8	92	79	5.1	4.4	12.8	4.3	0.5	1	810	527				6	8	5	8	110	37		high dose	yes
97	female	yes	no	no	yes	no	143	124	62	36.7	31	1587	145	147	1.2	135	4.5	17	7	344	8.3	375	126	22	4.1	11.7	20.8	0.7	1.1	880	678		118	126	6	8	5	4	79	41	5	high dose	yes
28	female	no	no	no	no	no	100	110	70	36	26.5	423	205	20	0.4	137	2.8	28	17	667	6.8	100	24	18.7	4.5	12.5	17.3	0.8	0.8	3100	454	992			7	8	5	4	121	7		high dose	no
49	female	yes	yes	no	no	no	100	90	62	36	20	9	116	102	1.47	138	4.3	17	20	501	7.8	2847	60	33.9	3.4	10.6	30	1	1.1	4160	605				5	7	4	3	85	27	4	high dose	yes
88	male	no	no	no	no	no	65		100	36.5	28	13	154	73	1.3	140	4.7	28	17	310	7.4	206	170	7.2	3	11.4	6.5	0.5	1.1	3960	741	6150			6	7	4	4	232	13		high dose	no
48	male	no	no	no	no	no	67	110	78	36.5		3	165	36	0.6	140	3.9	54	45	450	8.8	709	108	6.9	5.4	15	6	0.5	0.9	450	839	70			4	5	2	6	156	12		high dose	no
58	female	no	no	no	no	no	75	152	75	36.5	31	7	125	50	0.66	142	4.2	40	46	615	7.3	154	93	11.1	4.5	12	10.6	0.3	1.03	4980	797		258		45	47	44	9	146	10	39	pulse	no
62	female	no	no	yes	yes	no	112	115	75	36.4	27	1435	214	189	9.03	132	4	50	27	423	8.9	920	253	13.1	3.1	8.5	12.2	0.6	1.4	430	678	12600			36	37	34	4	116	24		pulse	no
62	male	yes	yes	no	no	no	53	133	83	36.5	24	3	162	57	0.9	137	4	42	59	510	8.5	358	51	10	5.5	15.6	8.5	0.5	0.8	200	724	575			30	31	20	1	178	12		pulse	no
60	male	no	no	no	yes	no	75	123	74	36.5	31	3	216	132	2.1	138	4	48	28	561	8.4	872	26	9.9	5.1	14.4	8.8	0.5	0.9	660	467	1300	357	110	29	30	28	4	210	7	7	pulse	yes
76	male	no	no	yes	no	no	90	149	65	36.4	29.3	19	427	70	0.86	138	4.5	29	45	711	8.9	978	148	6.5	5	14.5	5.9	0.2	0.9	1540	678		207		29	30	28	6	168	21	13	pulse	yes
56	male						81	156	56	36	29	9	334	38	0.8	127	4.2	25	31	648	8.1	491	154	12.6	4.2	12.6	11.3	0.6	0.9	1280	678	401			28	30	27	8	157	25	21	pulse	yes
64	male	no	no	yes	no	no	96	114	62	36			128	62	0.8	135	3.8	27	17	378	8.4	769	314	17.4	4.7	14	16	0.6	1	680	861	410			25	27	24	6	180	23	9	pulse	no
64	male	no	no	no	yes	yes	176	117	74	36	26	28	118	93	4.7	141	4	41	13	886	6.6	681	91	13.7	3.3	9.2	13.2	0.2	1	510	457	10000	322	117	24	26	23	8	171	19	12	pulse	no
54	female	no	no	yes	yes	no	80	137	67	36	29	4	103	29	0.6	127	4.7	102	90	358	8.6	619	247	5.1	5.01	11.3	4.5	0.5	0.9	2120	741				18	20	17	4	201	39	6	pulse	yes
70	male	no	yes	yes	yes	no	90	190	70	36	27.5		192	174	2.01	138	4.6	44	17	680	8.2	480	121	7.3	3.4	9.9	6.7	0.5	0.9	2020	666	3920	148	56	18	20	17	6	190	13	8	pulse	no
73	male	yes	no	yes	yes	no	80	118	75	36.5	21	13	102	42	0.8	138	4.7	35	38	204	8.9	185	113	8.3	4.2	13.2	5.3	2.1	1	210	678	356			15	17	12	1	168	43	4	pulse	yes
88	male	no	no	no	no	no	88	110	76	36.7	27	55	144	119	1.3	147	4.3	52	41	152	7.4	1398	133	7.2	4.5	14.6	6.3	0.2	1	10550	544	257	182	128	15	17	12	3	185	30	2	pulse	no
75	female	no	yes	yes	yes	yes	62	122	68	36.3	29	9	297	66	0.9	127	5.05	17	15	415	8	293	59	11.2	4.1	11.4	9.9	0.2	1.08	810	605	2660	116	95	13	15	10	8	178	14	2	pulse	no
53	male	no	no	no	yes	no	102	156	99	36.6	27	98	204	62	0.8	140	3.5	45	27	797	8.4	304	150	28.9	4.2	12.3	25.7	2.1	1	1610	759	922	211	84	13	15	6	2	145	7		pulse	no
35	female						103	137	88	38	34.8	8	120	15	0.68	137	4.12	17	71	488	9.3	114	130	13.6	4.6	13.4	12.6	0.8	10.3	2590	678	70	497		11	13	8	3	170	20	4	pulse	yes
35	male	no	no	no	no	no	86	142	78	36	30	3	201	39	0.73	137	4.2	35	21	432	8.3	688	46	11.7	5	15	10.6	0.5	0.9	310	678				12	13	10	6	155	26		pulse	no
60	male	no	no	yes	yes	no	92	140	78	36.5	27	9	120	51	0.7	130	4.9	75	68	666	8.4	655	162	21.3	5.2	15.6	18.6	1.8	1	250	470		133		12	13	10	8	178	24		pulse	no
55	male	no	no	yes	yes	no	72		112	36.8	24.6	17	328	37	1	133	3.6	85	63	866	8.2	650	280	15.8	4.5	12.5	14.4	0.8	0.9	1070	678	539	159	43	11	13	9	9	189	13		pulse	no
88	male	no	yes	no	yes	yes	78	114	94	36.2	26	113	89	134	2.16	138	4.8	73	35	457	8.3	156	115	24.4	3.6	9.5	16.9	1	1.2	1880	510	21100	106	61	10	12	7	4	89	38	4	pulse	no
62	male	no	no	yes	no	no	84	154	79	36.5	30	10	276	54	0.8	137	4.9	51	64	813	8.3	769	8.07	7.6	5	15	6.9	0.2	0.9	9370	311				10	11	11	4	200	12		pulse	no
70	male	no	no	no	yes	no	88	163	78	36	27		186	36	0.7	135	4	44	53	444	8.8	111	195	15.3	3.8	9.8	14.4	0.6	1	9020	512		117	129	10	11	10	6	189	14		pulse	no
46	male	no	no	no	no	no	77	130	68	36	32	8	135	25	0.8	138	3.8	42	71	624	8.6	1088	45	5	4.9	14.8	3.4	1.4	1	1230	573	70	213	115	10	11	9	8	100	23		pulse	no
33	female	no	no	no	no	no	78		100	36.8	30	6	127	76	1.3	140	4.8	32	78	643	8.7	1168	51	12.2	6	17.5	10.5	0.4	1	2320	900	291			10	11	8	3	176	6		pulse	no
62	male	no	no	no	no	no	82	130	88	36.4	24.2	11	106	52	0.81	133	4.8	28	38	647	7.6	2905	265	12.9	4.82	15.1	11.6	0.9	0.9	1860	677				10	11	7	7	150	9		pulse	no
45	female	no	no	no	no	no	75	109	68	36.3	34		126	36	0.52	141	4.2	36	31	408	8.6	99	30	12.5	4.6	12.9	11.4	0.5	0.9	330	663	475	252	122	9	10	7	6	169	10		pulse	no
74	male	yes	no	no	yes	no	92	101	59	36	31	190	119	132	1.93	131	4.24	20	20	228	9	528	31	7.6	4.5	13.2	6.2	0.4	1.08	710	527		93		8	10	5	4	156	14		pulse	no
54	male	no	yes	yes	yes	no	98	98	46	36	21	3704	197	104	8.1	138	3.7	113	126	610	9	3643	5	20.6	5.3	15.2	19	0.2	1.1	8890	370	31900	137	166	7	9	4	7	60	46	4	pulse	no
85	female	no	yes	yes	yes	yes	62	84	60	36.4	33	53	221	226	8.4	129	4	26	86	483	7.5	2862	213	13.6	3.6	11.9	11.9	0.8	1.2	1150	544	26600	124	77	6	8	3	4	80	50	3	pulse	no
